# Supplementary material
Source: PubMed Central journal article supplement (PMC4074555)
Supplement: NIHMS579592-supplement-01.pdf [file NIHMS579592-supplement-01.pdf]

**Supplementary Table 1. Participant characteristics at baseline (1976 NHS / 1989 NHSII) by hysterectomy status**

|                                     | NHS                                |                                 | NHSII                               |                               |
|-------------------------------------|------------------------------------|---------------------------------|-------------------------------------|-------------------------------|
|                                     | No Hysterectomy<br>(N=88,339; 86%) | Hysterectomy<br>(N=13,862; 14%) | No hysterectomy<br>(N=108,129; 96%) | Hysterectomy<br>(N=3,970; 4%) |
| Mean (SD)                           |                                    |                                 |                                     |                               |
| Age (years)                         | 41.6 (7.1)                         | 46.3 (5.9)                      | 34.6 (4.6)                          | 38.9 (3.1)                    |
| BMI (kg/m <sup>2</sup> )            | 23.6 (4.1)                         | 24.1 (4.1)                      | 24.0 (4.9)                          | 25.3 (5.3)                    |
| Age at menarche                     | 12.5 (1.7)                         | 12.4 (1.9)                      | 12.4 (1.4)                          | 12.2 (1.5)                    |
| Parity*                             | 3.1 (1.5)                          | 3.5 (1.7)                       | 2.1 (0.9)                           | 2.2 (0.9)                     |
| Age at first birth*                 | 25.1 (3.3)                         | 24.7 (3.1)                      | 25.6 (4.0)                          | 22.9 (3.5)                    |
| Breastfeeding (years)*              | 0.6 (0.9)                          | 0.5 (0.8)                       | 1.1 (1.1)                           | 0.7 (0.9)                     |
| Duration OC use<br>(years)†         | 2.0 (3.2)                          | 1.3 (2.6)                       | 3.6 (3.5)                           | 3.4 (3.1)                     |
| Frequency (%)                       |                                    |                                 |                                     |                               |
| Nulliparous                         | 6.6                                | 5.0                             | 31.1                                | 11.0                          |
| Talc Use                            | 32.2                               | 32.2                            | --                                  | --                            |
| Ever OC use                         | 50.9                               | 38.5                            | 83.0                                | 90.8                          |
| Family history<br>of breast cancer  | 5.7                                | 6.6                             | 5.9                                 | 7.3                           |
| Family history<br>of ovarian cancer | 2.2                                | 2.5                             | 1.5                                 | 1.8                           |
| Smoking status                      |                                    |                                 |                                     |                               |
| Never                               | 43.9                               | 45.3                            | 65.7                                | 59.5                          |
| Past                                | 23.5                               | 22.6                            | 21.3                                | 22.2                          |
| Current                             | 32.6                               | 32.2                            | 13.1                                | 18.3                          |
| Postmenopausal                      | 12.2                               | 5.9                             | 0.4                                 | 0.3                           |
| Tubal Ligation                      | 12.4                               | 0.1                             | 15.9                                | 10.7                          |
| Oophorectomy                        |                                    |                                 |                                     |                               |
| Unilateral                          | 0.2                                | 16.7                            | 0.0                                 | 22.7                          |
| Unknown                             | 0.1                                | 25.8                            | 0.0                                 | 0.8                           |

\*Among parous women only

†Among oral contraceptive (OC) users only

**Supplementary Table 2. Participant characteristics at baseline (1976 NHS / 1989 NHSII) by oophorectomy status**

|                                  | NHS                                |                               | NHSII                               |                             |
|----------------------------------|------------------------------------|-------------------------------|-------------------------------------|-----------------------------|
|                                  | No oophorectomy<br>(N=96,806; 97%) | Oophorectomy<br>(N=2,515; 3%) | No oophorectomy<br>(N=112,159; 99%) | Oophorectomy<br>(N=909; 1%) |
| Mean (SD)                        |                                    |                               |                                     |                             |
| Age (years)                      | 42.1 (7.1)                         | 46.8 (5.8)                    | 34.7 (4.7)                          | 39.0 (3.2)                  |
| BMI (kg/m <sup>2</sup> )         | 23.7 (4.1)                         | 24.1 (4.0)                    | 24.1 (5.0)                          | 25.3 (5.2)                  |
| Age at menarche                  | 12.5 (1.8)                         | 12.5 (1.8)                    | 12.4 (1.4)                          | 12.2 (1.5)                  |
| Parity*                          | 3.1 (1.5)                          | 3.2 (1.6)                     | 2.1 (0.9)                           | 2.1 (0.8)                   |
| Age at first birth*              | 25.1 (3.3)                         | 24.6 (3.0)                    | 25.5 (4.0)                          | 22.9 (3.5)                  |
| Breastfeeding (years)*           | 0.5 (0.9)                          | 0.4 (0.7)                     | 1.1 (1.1)                           | 0.7 (0.8)                   |
| Duration OC use (yrs)†           | 2.0 (3.2)                          | 1.0 (2.4)                     | 3.6 (3.5)                           | 3.3 (3.0)                   |
| Frequency (%)                    |                                    |                               |                                     |                             |
| Nulliparous                      | 6.4                                | 7.4                           | 30.6                                | 12.9                        |
| Talc Use                         | 32.6                               | 39.4                          | --                                  | --                          |
| Ever OC use                      | 49.9                               | 33.8                          | 83.1                                | 90.9                        |
| Family history of breast cancer  | 5.9                                | 6.7                           | 5.9                                 | 7.7                         |
| Family history of ovarian cancer | 2.3                                | 2.3                           | 1.5                                 | 2.6                         |
| Smoking status                   |                                    |                               |                                     |                             |
| Never                            | 44.1                               | 43.9                          | 65.5                                | 57.4                        |
| Past                             | 23.5                               | 22.1                          | 21.3                                | 24.6                        |
| Current                          | 32.4                               | 34.0                          | 13.2                                | 17.9                        |
| Postmenopausal                   | 12.0                               | 7.0                           | 0.4                                 | 1.0                         |
| Tubal Ligation                   |                                    |                               |                                     |                             |
| Yes                              | 11.3                               | 0.7                           | 15.7                                | 9.4                         |
| Hysterectomy                     |                                    |                               |                                     |                             |
| Yes                              | 8.2                                | 92.0                          | 2.7                                 | 99.2                        |
| Unknown                          | 0.8                                | 0.2                           | 0.9                                 | 0.8                         |

\*Among parous women only

†Among oral contraceptive (OC) users only

**Supplementary Table 3. Hazard Ratios (HR) and 95% confidence intervals (CI) for ovarian cancer for tubal ligation, hysterectomy, and unilateral oophorectomy by selected characteristics, NHS and NHSII**

|                                            | Tubal ligation |                         |       | Hysterectomy |                         |       | Unilateral oophorectomy |                         |       |
|--------------------------------------------|----------------|-------------------------|-------|--------------|-------------------------|-------|-------------------------|-------------------------|-------|
|                                            | Cases          | MV-adjusted HR (95% CI) | P-het | Cases        | MV-adjusted HR (95% CI) | P-het | Cases                   | MV-adjusted HR (95% CI) | P-het |
| By family history of breast/ovarian cancer |                |                         |       |              |                         |       |                         |                         |       |
| No                                         | 1052           | 0.80 (0.67, 0.97)       | 0.23  | 893          | 0.85 (0.69, 1.05)       | 0.10  | 883                     | 0.62 (0.46, 0.85)       | 0.21  |
| Yes                                        | 212            | 0.57 (0.36, 0.91)       |       | 199          | 0.54 (0.33, 0.89)       |       | 201                     | 1.10 (0.62, 1.97)       |       |
| By OC use                                  |                |                         |       |              |                         |       |                         |                         |       |
| Never                                      | 648            | 0.84 (0.64, 1.12)       | 0.63  | 553          | 0.87 (0.67, 1.13)       | 0.18  | 552                     | 0.65 (0.45, 0.94)       | 0.81  |
| Ever                                       | 616            | 0.71 (0.57, 0.88)       |       | 539          | 0.73 (0.53, 0.99)       |       | 532                     | 0.73 (0.49, 1.08)       |       |
| By PMH use (Postmenopausal)                |                |                         |       |              |                         |       |                         |                         |       |
| Never PMH users                            | 396            | 0.64 (0.44, 0.92)       | 0.18  | 316          | 0.81 (0.54, 1.20)       | 0.27  | 278                     | 0.57 (0.30, 1.08)       | 0.98  |
| Ever PMH users                             | 454            | 0.90 (0.68, 1.19)       |       | 333          | 1.10 (0.77, 1.57)       |       | 394                     | 0.68 (0.47, 0.98)       |       |
| By Talc use (NHS)                          |                |                         |       |              |                         |       |                         |                         |       |
| Never Talc users                           | 664            | 0.90 (0.71, 1.14)       | 0.23  | 556          | 0.80 (0.61, 1.04)       | 0.63  | 544                     | 0.72 (0.50, 1.04)       | 0.46  |
| Ever Talc Users                            | 335            | 0.66 (0.46, 0.94)       |       | 308          | 1.05 (0.75, 1.49)       |       | 309                     | 0.53 (0.31, 0.89)       |       |
| By tubal ligation                          |                |                         |       |              |                         |       |                         |                         |       |
| No                                         |                | --                      |       | 942          | 0.80 (0.65, 0.97)       | 0.75  | 931                     | 0.75 (0.56, 0.99)       | 0.17  |
| Yes                                        |                | --                      |       | 150          | 0.74 (0.38, 1.43)       |       | 153                     | 0.28 (0.10, 0.79)       |       |
| By hysterectomy                            |                |                         |       |              |                         |       |                         |                         |       |
| No                                         | 856            | 0.73 (0.60, 0.89)       | 0.75  |              | --                      |       | 850                     | 0.86 (0.55, 1.35)       | 0.33  |
| Yes                                        | 236            | 0.74 (0.45, 1.20)       |       |              | --                      |       | 214                     | 0.62 (0.44, 0.88)       |       |
| By oophorectomy                            |                |                         |       |              |                         |       |                         |                         |       |
| No                                         | 1018           | 0.78 (0.65, 0.93)       | 0.17  | 1000         | 0.83 (0.67, 1.02)       | 0.33  |                         | --                      |       |
| Yes                                        | 66             | 0.43 (0.14, 1.37)       |       | 64           | 0.77 (0.34, 1.72)       |       |                         | --                      |       |

Adjusted for age, time period, cohort, BMI (continuous), nulliparity, parity (continuous), age at first birth (continuous), oral contraceptive use (never, <1 year, 1-5 years, 5-10 years, 10+ years), age at menarche (<12, 12, 13, 14+), menopausal status (premenopausal/unknown, postmenopausal), family history of breast and ovarian cancer (yes/no), smoking status (never, past, current), talc use (yes, no) (NHS only), estrogen PMH use (never, past <5 years, past 5+ years, current <5 years, current 5+ years), estrogen and progesterone PMH use (yes, no), other PMH use (yes, no), and the other surgeries (tubal ligation yes/no, hysterectomy yes/no, oophorectomy yes/no).
